# Supplementary material
Source: Springer Nature journal article supplement (https://www.springermedizin.de/resource/supplementary/12879_2013_4208_MOESM1_ESM.pdf/9445260)
Supplement: MOESM1 [file 9445260]

Result derived from search on PubMed (204), Embase (207) and CINAHL (287)

698 studies screened by title and/ or abstract

23 articles met inclusion criteria and hand-searched for references

30 full-text articles assessed for eligibility

25 articles included in the review

**675 irrelevant articles excluded:**

- selective populations 113
- accompanied by an intervention 6
- only women or only men 180
- no prevalence study 319
- individuals with symptoms 49
- duplicates 4
- systematic reviews 4

**7 references included**

**5 articles excluded:**

- no prevalence study 2
- no general population or unknown 2
- study design not fully described 1
